# Supplementary material for: Molecular characterization and PCR-based replicon typing of multidrug resistant Shigella sonnei isolates from an outbreak in Thimphu, Bhutan
Source: PubMed Central journal article supplement (PMC3936901; doi:10.1186/1756-0500-7-95), 2014-02-20
Supplement: 1756-0500-7-95-S1.pdf [file 1756-0500-7-95-S1.pdf]

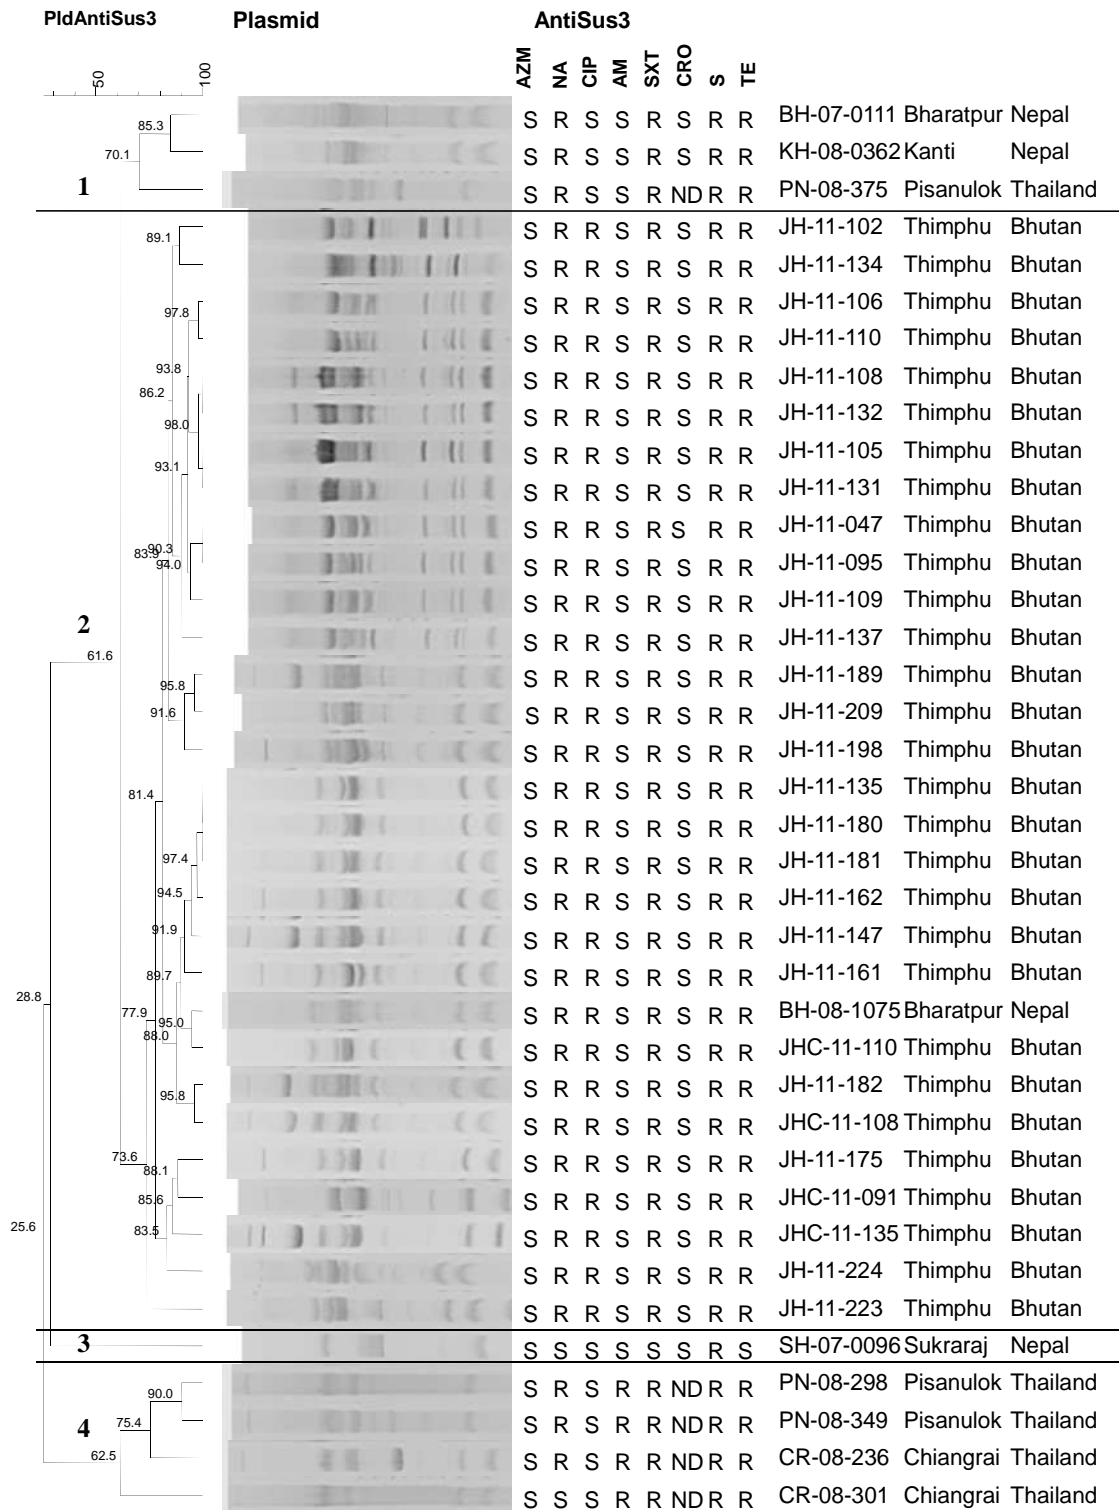

**Additional file 1** Dendrogram obtained by cluster analysis of the plasmid patterns of *S. sonnei* from Bhutan, Nepal and Thailand combined with antibiotic susceptibility. AZM, azithromycin; NA, nalidixic acid; CIP, ciprofloxacin; AM, ampicillin; SXT, trimethoprim-sulfamethoxazole; CRO, ceftriaxone; S, Streptomycin; TE, tetracycline; S, susceptible; R, resistant; ND, not determined.
